# Supplementary material for: Rapid and Easy Detection of Microcystin-LR Using a Bioactivated Multi-Walled Carbon Nanotube-Based Field-Effect Transistor Sensor
Source: MDPI journal article supplement (doi:10.3390/bios14010037), 2024-01-11
Supplement: s1 [file s1]

# **Supplementary Materials**

## **Rapid and easy detection of microcystin-LR using a bioactivated multi-walled carbon nanotube-based field-effect transistor sensor**

**Myeongsoon Lee <sup>1</sup>, Seong H. Kim <sup>2</sup>, Don Kim <sup>1</sup> and Hak Jun Kim <sup>1,\*</sup>**

<sup>1</sup> Department of Chemistry, Pukyong National University, Busan 48513, Republic of Korea; kimhj@pknu.ac.kr

<sup>2</sup> Department of Chemical Engineering and Materials Research Institute, Pennsylvania State University, University Park, PA 16802, USA; shk10@psu.edu

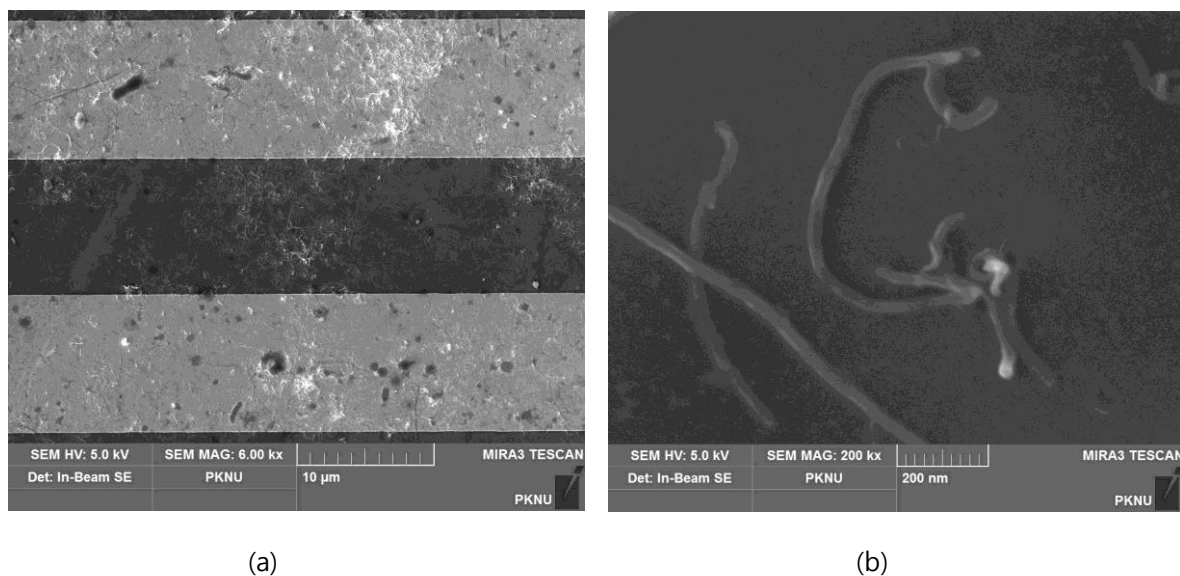

**Figure S1.** SEM images of the (a) MCTA-MWCNTs immobilized between the drain and source electrodes by solution dropping, and immobilized MCTA-MWCNTs after washing with PBS (scale bars: 10  $\mu\text{m}$ ) and (b) MCTA-MWCNTs entangled on the surface of the electrode.

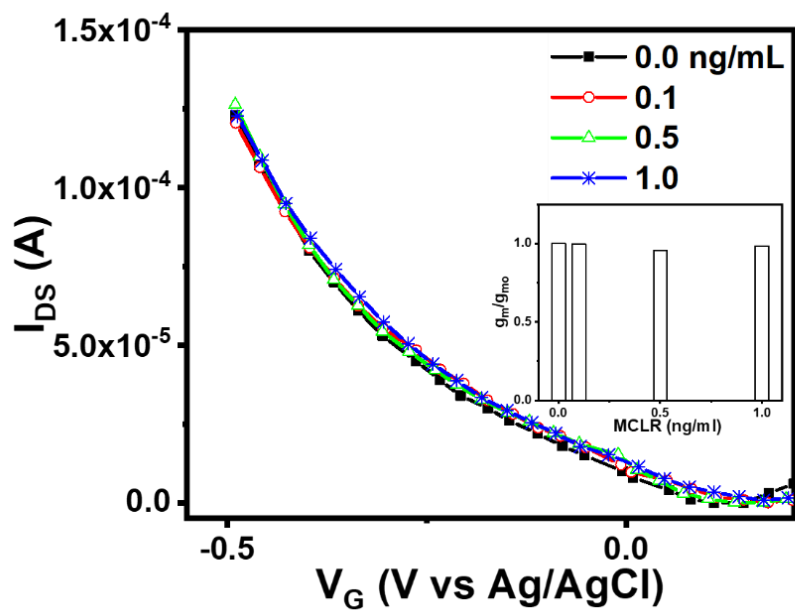

**Figure S2.**  $I_{DS}$ – $V_G$  plots of the FET assembled using BSA-coated MWCNTs at a constant drain-source potential ( $V_{DS} = -0.5$  V) with varying concentrations of MC-LR in PBS buffer, confirming the lack of bioactivity of the MWCNT-FET sensor without the MCTAs. The relative transconductance values ( $g_m/g_{m0}$ ) corresponding to the various levels of MC-LR are identical.

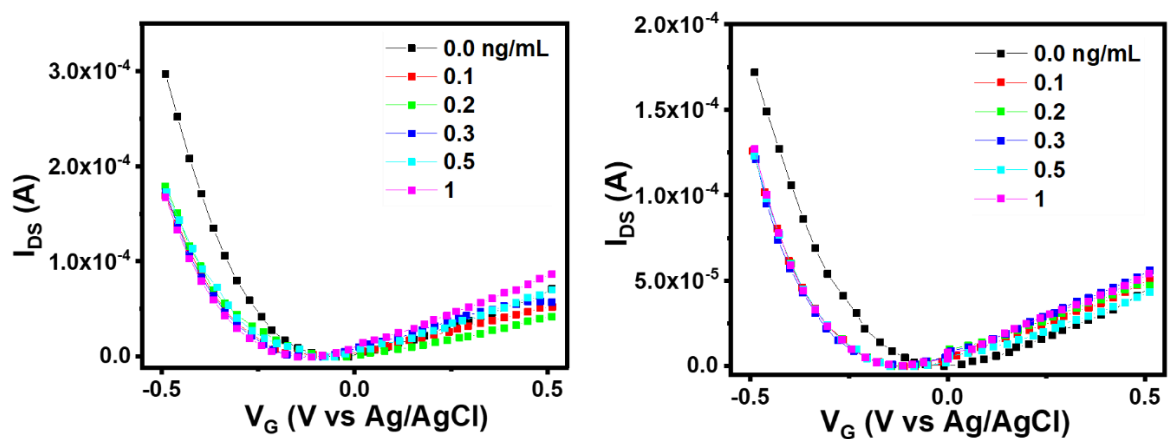

**Figure S3.**  $I_{DS}$ – $V_G$  characteristic curves of the MCTA-MWCNT FET corresponding to various concentrations of (a) MC-YR and (b) MC-LY in PBS buffer, at a  $V_{DS}$  of  $-0.5$  V.

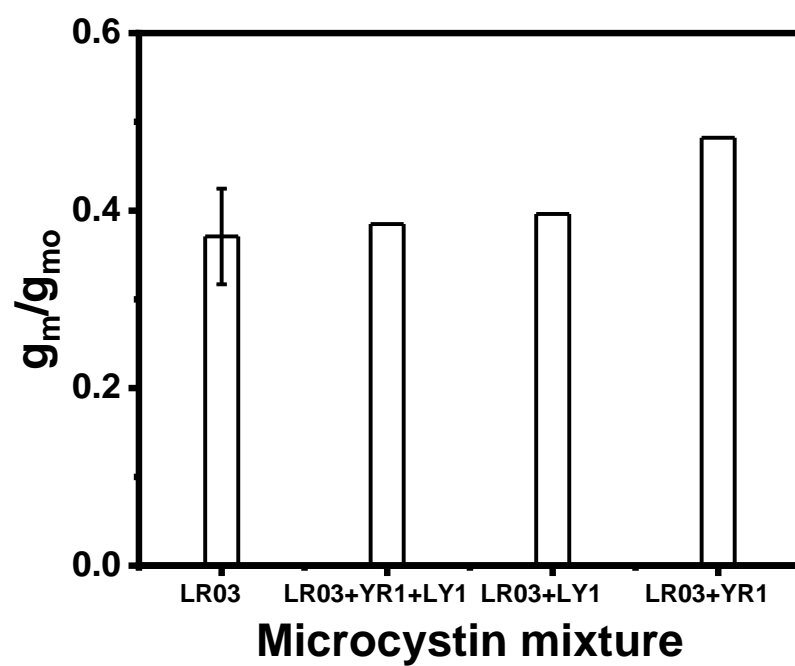

**Figure S4.** Relative conductance of MC-LR (0.3 ng/mL) with respect to various combinations of the MC-LY and MC-YR levels. In the  $x$ -axis, LR03, YR1, and LY1 correspond to MC-LR (0.3 ng/mL), MC-YR (1.0 ng/mL), and MC-LY (1.0 ng/mL) in PBS buffer, respectively.

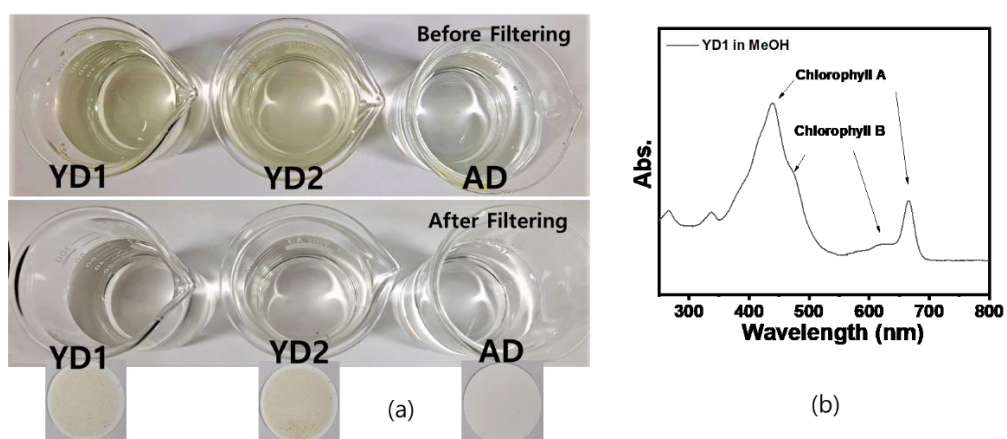

**Figure S5.** (a) Optical images of water sourced from the Yeongju dam (YD1 and YD2) and Andong dam (AD), before and after filtering; the used filter papers are also shown. (b) UV-vis spectrum of YD1.
